# Supplementary material for: Enclosure in Combination with Mowing Simultaneously Promoted Grassland Biodiversity and Biomass Productivity
Source: MDPI journal article supplement (doi:10.3390/plants11152037), 2022-08-04
Supplement: s1 [file s1]

## *Supplementary Material*

### Supplementary Tables

**Table S1.** The importance values of plant species surveyed in experimental plots T1 through T5.

| Functional group | Species                           | T1    | T2   | T3   | T4   | T5   |
|------------------|-----------------------------------|-------|------|------|------|------|
| Poaceae          | <i>Leymus chinensis</i>           | 0.681 | 0.3  | 0.6  | 0.7  | 0.04 |
| Poaceae          | <i>Poaceae hierochloeglabra</i>   | 0.004 | 0.02 |      |      | 0.1  |
| Poaceae          | <i>Stipa Baicalensis</i>          | 0.005 | 0.02 | 0.01 | 0.02 | 0.01 |
| Poaceae          | <i>Poa sphondylodes</i>           | 0.01  | 0.01 | 0.01 |      | 0.01 |
| Poaceae          | <i>Achnatherum sibiricum</i>      |       | 0.02 |      |      | 0.06 |
| Poaceae          | <i>Achnatherum sibiricum</i>      |       | 0.01 | 0.01 |      | 0.05 |
| Poaceae          | <i>Koeleria cristata</i>          |       | 0.02 | 0.02 |      | 0.05 |
| Poaceae          | <i>Helictotrichon schellianum</i> |       |      |      |      | 0.01 |
| Poaceae          | <i>Festuca ovina</i>              |       | 0.01 | 0.03 |      | 0.09 |
| Sedge            | <i>Carex spp</i>                  | 0.33  | 0.13 | 0.09 | 0.06 | 0.16 |
| Sedge            | <i>Carex pediformis</i>           |       | 0.17 |      |      | 0.06 |
| Legume           | <i>Vicia amoena</i>               | 0.01  |      |      |      |      |
| Legume           | <i>Astragalus melilotoides</i>    | 0.17  | 0.03 |      |      |      |
| Legume           | <i>Gueldenstaedtia verna</i>      |       | 0.03 |      |      | 0.01 |
| Legume           | <i>Oxytropis myriophylla</i>      |       |      |      |      | 0.01 |
| Legume           | <i>Astragalus adsurgens</i>       |       |      |      |      | 0.02 |
| Legume           | <i>Thermopsis lanceolata</i>      | 0.02  | 0.01 | 0.02 |      |      |
| Forb             | <i>Artemisia commutata</i>        | 0.02  |      |      |      | 0.01 |
| Forb             | <i>Potentilla bifurca</i>         | 0.04  | 0.02 | 0.01 |      | 0.01 |
| Forb             | <i>Galium verum</i>               |       | 0.04 |      |      | 0.03 |
| Forb             | <i>Potentilla tanacetifolia</i>   | 0.02  | 0.02 | 0.01 |      | 0.03 |
| Forb             | <i>Fallopia convolvulus</i>       | 0.04  |      |      |      |      |
| Forb             | <i>Taraxacum mongolicum</i>       | 0.01  |      | 0.01 |      | 0.04 |
| Forb             | <i>Axyris amaranthoides</i>       | 0.02  |      |      |      |      |
| Forb             | <i>Heteropappus altaicus</i>      |       |      |      | 0.07 |      |
| Forb             | <i>Scorzonera divaricata</i>      | 0.01  |      |      |      | 0.01 |
| Forb             | <i>Tephroseris kirilowii</i>      |       | 0.01 |      |      |      |
| Forb             | <i>Artemisia frigida</i>          |       | 0.01 | 0.01 | 0.02 | 0.02 |
| Forb             | <i>Artemisia laciniata</i>        |       | 0.07 | 0.09 | 0.06 | 0.17 |
| Forb             | <i>Serratula komarovii</i>        |       | 0.03 |      |      | 0.02 |
| Forb             | <i>Iris ventricosa</i>            |       | 0.03 |      |      | 0.02 |
| Forb             | <i>Adenophora stricta</i>         |       | 0.03 |      |      | 0.01 |
| Forb             | <i>Allium bidentatum</i>          |       | 0.04 | 0.06 | 0.05 | 0.06 |
| Forb             | <i>Pulsatilla turczaninovii</i>   |       | 0.09 | 0.01 |      | 0.07 |
| Forb             | <i>Allium tenuissimum</i>         |       | 0.02 | 0.02 | 0.04 | 0.02 |

|      |                                   |      |      |      |      |
|------|-----------------------------------|------|------|------|------|
| Forb | <i>Artemisia dracunculus</i>      | 0.04 |      |      |      |
| Forb | <i>Thalictrum squarrosum</i>      | 0.09 |      |      | 0.03 |
| Forb | <i>Cymbaria daurica</i>           |      | 0.02 |      |      |
| Forb | <i>Lepidium apetalum</i>          |      | 0.04 | 0.02 | 0.01 |
| Forb | <i>Sibbaldia adpressa</i>         |      | 0.01 |      |      |
| Forb | <i>Chenopodium acuminatum</i>     |      | 0.01 |      | 0.03 |
| Forb | <i>Dianthus chinensis</i>         |      | 0.01 |      |      |
| Forb | <i>Orostachys fimbriatus</i>      | 0.02 | 0.04 | 0.05 | 0.01 |
| Forb | <i>Lychnis sibirica</i>           |      | 0.02 |      |      |
| Forb | <i>Dontostemon micranthus</i>     |      | 0.01 |      | 0.02 |
| Forb | <i>Allium ramosum</i>             |      | 0.03 | 0.03 | 0.02 |
| Forb | <i>Convolvulus ammannii</i>       |      | 0.03 | 0.04 |      |
| Forb | <i>Thalictrum petaloideum</i>     |      |      |      | 0.03 |
| Forb | <i>Bupleurum scorzonerifolium</i> |      |      |      | 0.01 |
| Forb | <i>Iris tigridia</i>              |      |      |      | 0.02 |
| Forb | <i>Carpesium abrotanoides</i>     |      |      |      | 0.01 |
| Forb | <i>Ixeris polycephala</i>         |      |      |      | 0.01 |
| Forb | <i>Potentilla verticillaris</i>   |      |      |      | 0.01 |
| Forb | <i>Filifolium sibiricum</i>       |      |      |      | 0.01 |
| Forb | <i>Potentilla acaulis</i>         |      |      |      | 0.07 |

---

**Table S2.** Single linear regression models fitted to plant aboveground biomass in response to plant diversity index under field treatments. NS means not significant.

| Treatment | Index    | Intercept | Slope   | $R^2$ | Significance |
|-----------|----------|-----------|---------|-------|--------------|
| T1        | Alatalo  | 316.63    | -126.28 | 0.11  | NS           |
| T1        | Margalef | 284.69    | -36.08  | 0.05  | NS           |
| T1        | Patrick  | 284.35    | -4.6    | 0.03  | NS           |
| T1        | Pielou   | 306.56    | -156.82 | 0.26  | NS           |
| T1        | Shannon  | 292.36    | -61.8   | 0.17  | NS           |
| T1        | Simpson  | 275.24    | -52.93  | 0.07  | NS           |
| T2        | Alatalo  | 487.19    | -384.53 | 0.21  | NS           |
| T2        | Margalef | 384.85    | -49.6   | 0.21  | NS           |
| T2        | Patrick  | 447.98    | -11.88  | 0.34  | NS           |
| T2        | Pielou   | 542.82    | -407.04 | 0.7   | **           |
| T2        | Shannon  | 472.59    | -109.47 | 0.62  | **           |
| T2        | Simpson  | 546.99    | -386.05 | 0.64  | **           |
| T3        | Alatalo  | -24.26    | 368.34  | 0.37  | NS           |
| T3        | Margalef | 126.29    | 20.44   | 0.14  | NS           |
| T3        | Patrick  | 120.14    | 3.47    | 0.16  | NS           |
| T3        | Pielou   | 55.99     | 176.99  | 0.17  | NS           |
| T3        | Shannon  | 90.69     | 49.49   | 0.23  | NS           |
| T3        | Simpson  | 66.87     | 156.44  | 0.31  | NS           |
| T4        | Alatalo  | 225.97    | -94.63  | 0.06  | NS           |
| T4        | Margalef | 240.91    | -57.27  | 0.39  | NS           |
| T4        | Patrick  | 251.89    | -9.25   | 0.35  | NS           |
| T4        | Pielou   | 225.34    | -84.71  | 0.26  | NS           |
| T4        | Shannon  | 225.25    | -41.26  | 0.36  | NS           |
| T4        | Simpson  | 221.46    | -86.25  | 0.31  | NS           |
| T5        | Alatalo  | 101.2     | -24.29  | 0.02  | NS           |
| T5        | Margalef | 56.74     | 7.48    | 0.04  | NS           |
| T5        | Patrick  | 11.35     | 3.51    | 0.12  | NS           |
| T5        | Pielou   | 122.64    | -45.64  | 0.03  | NS           |
| T5        | Shannon  | 91.06     | -2.54   | 0     | NS           |
| T5        | Simpson  | 101.24    | -18.97  | 0     | NS           |
